# Supplementary material for: Combination of LIGHT (TNFSF14)-Armed Myxoma Virus Pre-Loaded into ADSCs and Gemcitabine in the Treatment of Experimental Orthotopic Murine Pancreatic Adenocarcinoma
Source: MDPI journal article supplement (doi:10.3390/cancers14082022), 2022-04-16
Supplement: s1 [file s1]

# Supplementary Materials: Combination of LIGHT(TNFSF14)-Armed Myxoma Virus Pre-loaded into ADSCs and Gemcitabine in the Treatment of Experimental Orthotopic Murine Pancreatic Adenocarcinoma

Joanna Jazowiecka-Rakus, Aleksander Sochanik, Agata Hadryś, Wojciech Fidyk, Ewa Chmielik, Masmudur M. Rahman, Grant McFadden

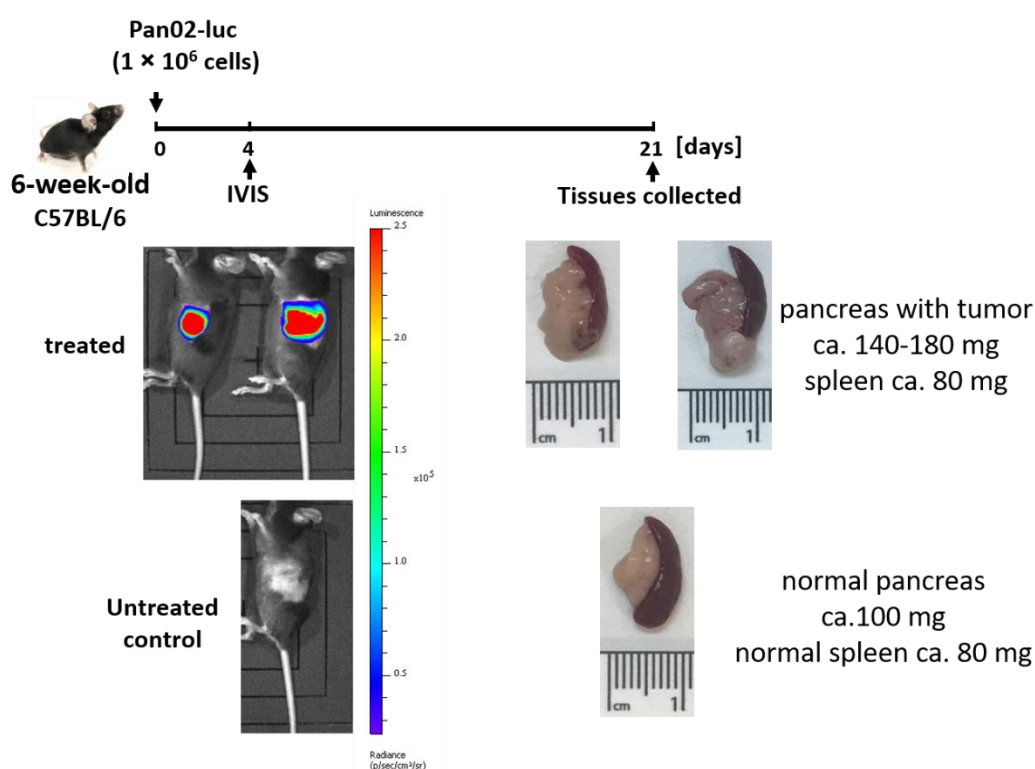

**Figure S1.** Establishment of orthotopic pancreatic tumors. C57BL/6 mice were orthotopically injected (day 0) with  $1 \times 10^6$  Pan02-luc cells suspended in 30  $\mu$ L PBS<sup>−</sup>. Four days after implantation, mice were anesthetized with 2.5% isoflurane and intraperitoneally injected with 1.5 mg D-luciferin (Promega) and bioluminescence images were acquired. BLI expressed as radiance (photons/sec/cm<sup>2</sup>/sr). After 21 days the dissected organs (pancreata and spleens) were macroscopically examined for size as well as organ weight.

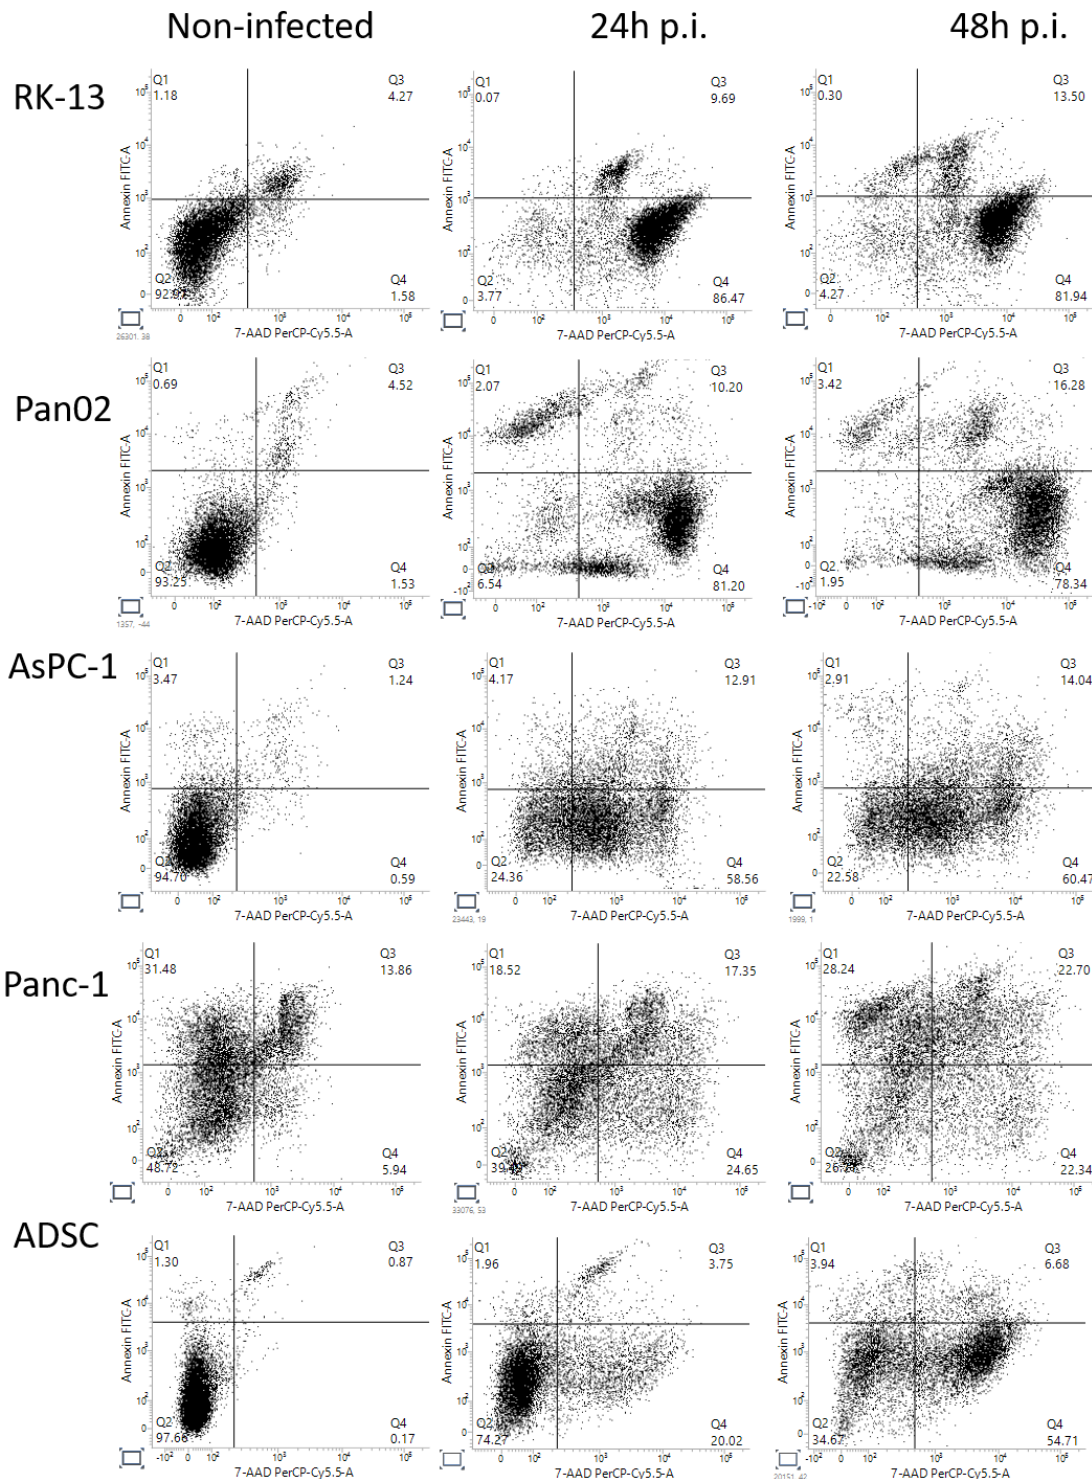

**Figure S2.** Quantitative Analysis of Apoptosis by Flow Cytometry. Cells were seeded at a density of  $1 \times 10^5$  cells/well using 6-well plates and vMyx-mLIGHT-FLuc/tdTr (MOI = 5) was added to the cultured cells. After 24 h and 48 h the cells were collected and washed twice with PBS<sup>-</sup> and staining buffer. Then the cells were stained with anti-Annexin V antibody and 7-aminoactinomycin D (Bio-Legend 640922) and analyzed for apoptosis/necrosis using flow cytometry (BD FACS Canto II). Annexin V was detected using FITC channel and 7-AAD using PerCP-Cy5.5 channel and a region for live cells was defined. Non-infected cells were used as a control. Flow cytometry plots for non-infected and infected with vMyx-LIGHT cell lines: RK-13, Pan02, AsPC-1, Panc-1 and ADSCs. Q1 - early apoptotic cells; Q2 - viable cells; Q3 - late apoptotic cells and Q4 - necrotic cells.

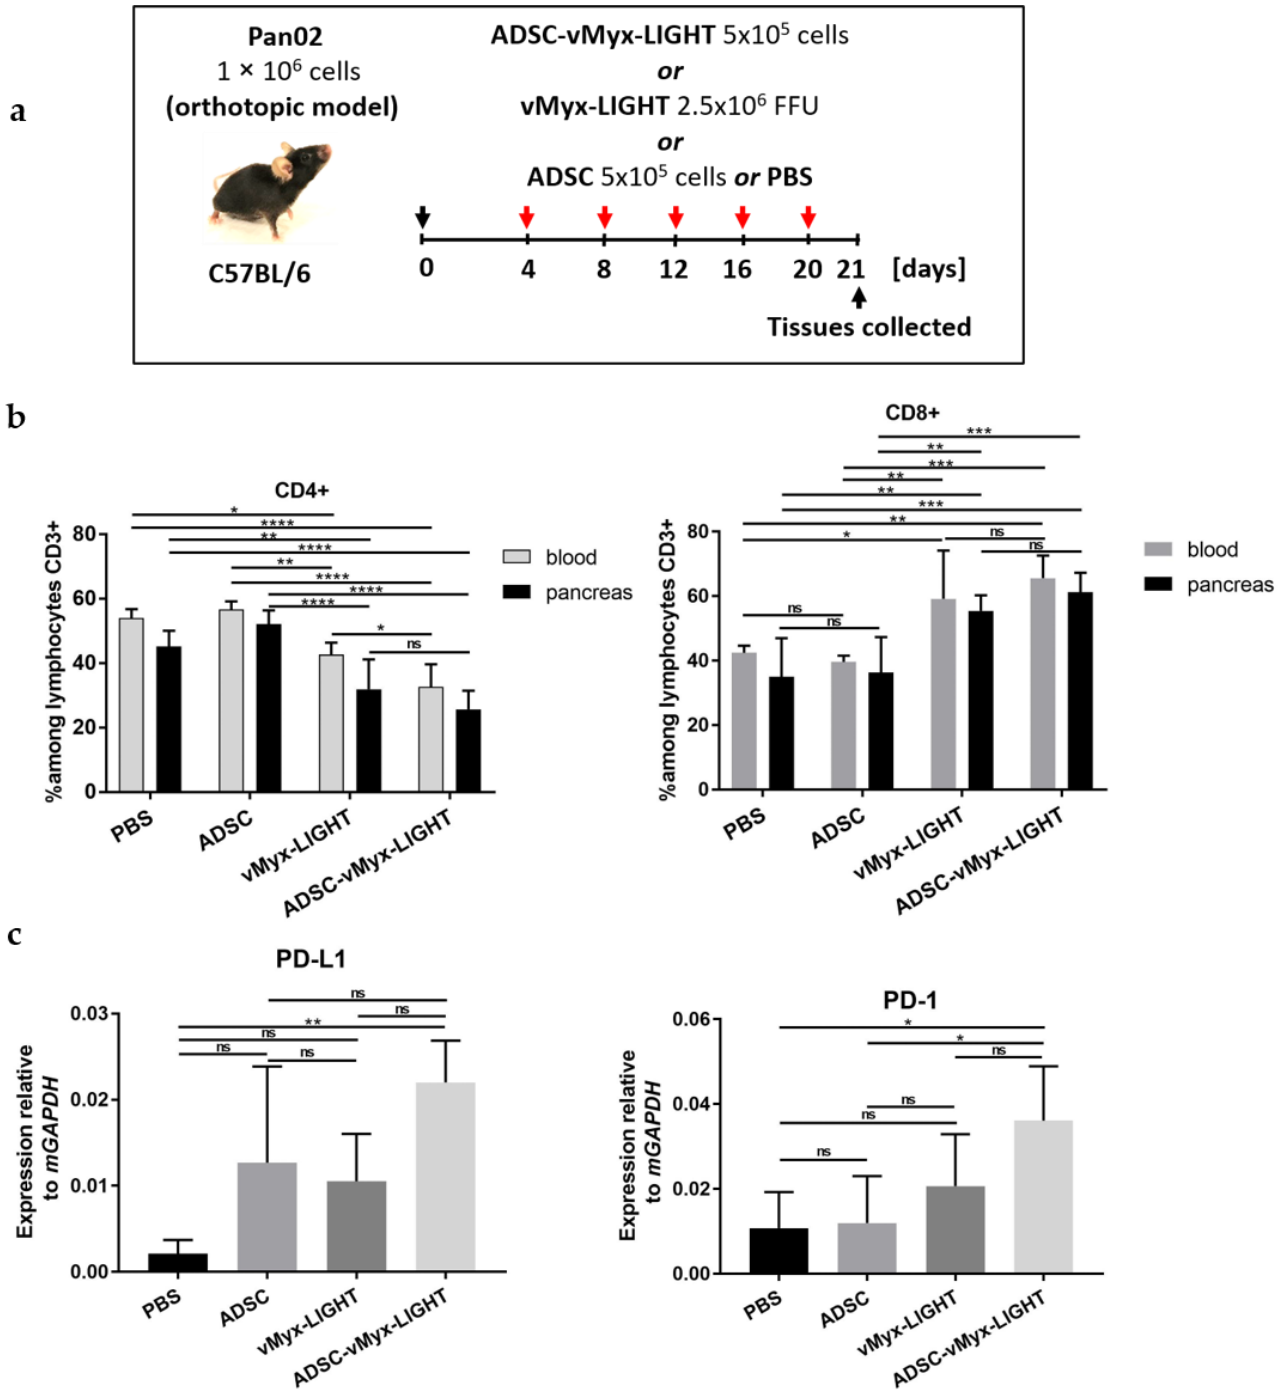

**Figure S3.** Antitumor immune response after monotherapy of experimental pancreatic adenocarcinoma using LIGHT-armed MYXV construct. Pancreatic tumors were established in recipient C57BL/6NCr1 mice ( $n = 5/\text{group}$ ) (day 0) by orthotopic implantation of  $1 \times 10^6$  Pan02 cells/ $30 \mu\text{L}$  PBS<sup>-</sup>. For five-dose treatment regimens (days 4, 8, 12, 16 and 20), mice were injected IP with ADSCs ( $5 \times 10^5$  cells/ $100 \mu\text{L}$  PBS<sup>-</sup>) or ADSCs infected (MOI = 5) for 24 h with vMyx-LIGHT ( $5 \times 10^5$  cells/ $100 \mu\text{L}$  PBS<sup>-</sup>) or with unshielded vMyx-LIGHT ( $2.5 \times 10^6$  FFU/ $100 \mu\text{L}$  PBS<sup>-</sup>), or  $100 \mu\text{L}$  PBS<sup>-</sup> (control). After 21 days, mice were sacrificed and the pancreata were excised. (a) timeline of experiment; (b) flow cytometry data showing CD4<sup>+</sup> and CD8<sup>+</sup> cell percentage among CD3<sup>+</sup> lymphocytes in blood and pancreata (21st day); (c) Analysis of PD-L1 and PD-1 gene expression (RT-qPCR) in pancreata. Changes in the gene expression were rendered as a ratio of target gene vs. reference gene (*mGAPDH*) relative to expression in control samples. The data (mean  $\pm$  SD) were analyzed with one-way ANOVA; statistically significant differences are indicated (\* $p \leq 0.05$ ; \*\* $p \leq 0.01$ ; \*\*\* $p \leq 0.001$ ; \*\*\*\* $p \leq 0.0001$ ; ns: non-significant differences).

**Table S1.** Primers.

| <b>Gene name</b>                | <b>Forward primer (5'-3')</b> | <b>Reverse primer (5'-3')</b> |
|---------------------------------|-------------------------------|-------------------------------|
| <i>mTNF-<math>\alpha</math></i> | GGTGCCTATGTCTCAGCCTCTT        | GCCATAGAACTGATGAGAGGGAG       |
| <i>mINF<math>\gamma</math></i>  | CAGCAACAGCAAGGCGAAAAAGG       | TTCCGCTTCCTGAGGCTGGAT         |
| <i>mIL2</i>                     | GCGGCATGTTCTGGATTGACTC        | CCACCACAGTTGCTGACTCATC        |
| <i>mIL-15</i>                   | GTAGGTCTCCCTAAAACAGAGGC       | TCCAGGAGAAAGCAGTTCATTGC       |
| <i>mIL10</i>                    | CGGGAAGACAATAACTGCACCC        | CGGTTAGCAGTATGTTGTCCAGC       |
| <i>mTGF<math>\beta</math></i>   | TGATACGCCTGAGTGGCTGTCT        | CACAAGAGCAGTGAGCGCTGAA        |
| <i>mCD8a</i>                    | ACTACCAAGCCAGTGCTGCGAA        | ATCACAGGCGAAGTCCAATCCG        |
| <i>mCD4</i>                     | G TTCAGGACAGCGACTTCTGGA       | GAAGGAGAACTCCGCTGACTCT        |
| <i>mPD-L1</i>                   | TGCGGACTACAAGCGAATCACG        | CTCAGCTTCTGGATAACCCTCG        |
| <i>mPD-1</i>                    | CGGTTTCAAGGCATGGTCATTGG       | TCAGAGTGTCGTCCTTGCTTCC        |
| <i>mLight</i>                   | GGAGACATAGTAGCTCATCTGCC       | CCACCAATACCTATCAAGCTGGC       |
| <i>mHVEM</i>                    | CCAGGCTACTTCTGTGAGAACC        | CAGTCAGCACATACAGTGTCTTG       |
| <i>mLT<math>\beta</math>R</i>   | TCCTTGAGGAAGTGGTGCTAC         | CGGTCACATGAATGCCATTTCGC       |
| <i>S18</i>                      | CGGAAAATAGCCTTCGCCATCAC       | ATCACTCGCTCCACCTCATCCT        |
| <i>mGAPDH</i>                   | CATCACTGCCACCCAGAAGACTG       | ATGCCAGTGAGCTTCCCGTTCAG       |
| <i>hGAPDH</i>                   | GTCTCCTCTGACTTCAACAGCG        | ACCACCCTGTTGCTGTAGCCAA        |
